# Supplementary material for: A Six Nuclear Gene Phylogeny of Citrus (Rutaceae) Taking into Account Hybridization and Lineage Sorting
Source: PubMed Central journal article supplement (PMC3713030; doi:10.1371/journal.pone.0068410), 2013-07-16

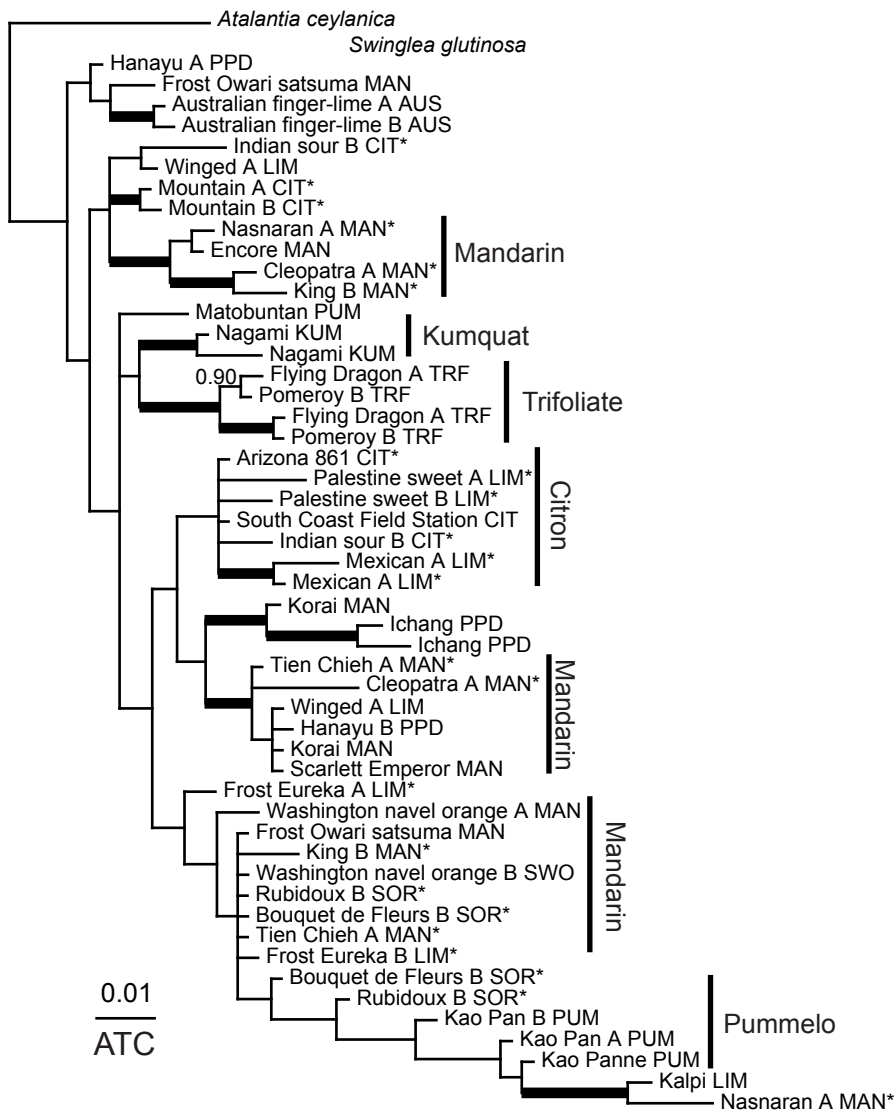

Supplement: pone.0068410.s003.pdf [file pone.0068410.s003.pdf]
