# Supplementary material for: A Six Nuclear Gene Phylogeny of Citrus (Rutaceae) Taking into Account Hybridization and Lineage Sorting
Source: PubMed Central journal article supplement (PMC3713030; doi:10.1371/journal.pone.0068410), 2013-07-16
Supplement: pone.0068410.s010.pdf [file pone.0068410.s010.pdf]

| Taxon Set                                                                       | 95% lower boundary<br>(observed gene to gene distance) | 80% critical value upper boundary | Difference | Implied <i>p</i> value |
|---------------------------------------------------------------------------------|--------------------------------------------------------|-----------------------------------|------------|------------------------|
| None removed                                                                    | 34                                                     | 11                                | 23         | < 0.05                 |
| 14 Hybrids* BDF<br>FRS HLM ICH IND<br>MEX NGM RBD WGL<br>AMB KLP PAL NIP<br>MIC | 5                                                      | 5                                 | <b>0</b>   | <b>&gt; 0.05</b>       |
| Random1: 17 21<br>14 13 26 27 18<br>1 7 4 5 24 19<br>9                          | 12                                                     | 4                                 | 8          | < 0.05                 |
| Random2: 13 27<br>19 16 22 21 20<br>23 26 17 25 24<br>9 12                      | 10                                                     | 4                                 | 6          | < 0.05                 |
| Random3: 24 22<br>15 23 12 17 26<br>8 20 18 12 3<br>27 10                       | 18                                                     | 4                                 | 14         | < 0.05                 |
| Random4: 8 24<br>15 22 23 13 18<br>19 21 3 5 17<br>25 4                         | 17                                                     | 4                                 | 13         | < 0.05                 |
| Random5: 12 2<br>18 6 15 3 9 17<br>20 4 16 7 27<br>24                           | 13                                                     | 4                                 | 9          | < 0.05                 |
| Random6: 3 22 1<br>7 18 6 19 10<br>20 15 11 13 12<br>5                          | 12                                                     | 4                                 | 8          | < 0.05                 |
| Random7: 15 4<br>27 12 2 23 13<br>6 14 21 20 18<br>17 26                        | 10                                                     | 3                                 | 7          | < 0.05                 |
| Random8: 7 12<br>21 6 22 5 15 9<br>10 25 14 19 23<br>4                          | 13                                                     | 4                                 | 9          | < 0.05                 |
| Random9: 20 4<br>21 18 15 17 1<br>14 6 22 16 9 5<br>8                           | 10                                                     | 4                                 | 6          | < 0.05                 |
| Random10: 23 26<br>17 20 15 7 8<br>18 14 21 13 22<br>6 11                       | 11                                                     | 4                                 | 7          | < 0.05                 |
