# Supplementary material for: A Six Nuclear Gene Phylogeny of Citrus (Rutaceae) Taking into Account Hybridization and Lineage Sorting
Source: PubMed Central journal article supplement (PMC3713030; doi:10.1371/journal.pone.0068410), 2013-07-16
Supplement: pone.0068410.s012.pdf [file pone.0068410.s012.pdf]

Inferred ancestry of individuals included in Structure and SNP analysis

| No. <sup>a</sup> | CRC no. <sup>b</sup> | Cultivar name             | Gp <sup>c</sup> | PUM(P)      | KUM(K)      | PPD(D)      | TRF(T)   | MAN(M)      | CIT(C)      | Other(O) |
|------------------|----------------------|---------------------------|-----------------|-------------|-------------|-------------|----------|-------------|-------------|----------|
| 5                | 3780                 | Mountain citron*          | 1               | 0.002(0)    | 0.556(0.33) | 0.28(0.17)  | 0.058(0) | 0.002(0.17) | 0.102(0)    | (0.33)   |
| 10               | 3877                 | Nagami#                   | 1               | 0.001(0)    | 0.985(0.67) | 0.005(0)    | 0.002(0) | 0.004(0.17) | 0.002(0)    | (0.16)   |
| 11               | 1455                 | Kalpi#                    | 2               | 0.002(0)    | 0.004(0.17) | 0.982(0.17) | 0.001(0) | 0.002(0)    | 0.008(0)    | (0.66)   |
| 12               | 1482                 | Palestine*                | 2               | 0.078(0)    | 0.007(0)    | 0.559(0)    | 0.02(0)  | 0.042(0.33) | 0.294(0.5)  | (0.17)   |
| 13               | 2320                 | Winged lime               | 2               | 0.006(0)    | 0.009(0.17) | 0.911(0.08) | 0.004(0) | 0.056(0.5)  | 0.014(0)    | (0.25)   |
| 15               | 3005                 | Frost Eureka*             | 2               | 0.003(0)    | 0.004(0)    | 0.438(0)    | 0.001(0) | 0.003(0.25) | 0.551(0.5)  | (0.25)   |
| 25               | 3546                 | South Coast Field Station | 2               | 0.001(0)    | 0.003(0)    | 0.001(0)    | 0.001(0) | 0.002(0)    | 0.992(0.83) | (0.17)   |
| 32               | 3822                 | Mexican*                  | 2               | 0.001(0)    | 0.004(0.08) | 0.549(0.17) | 0.005(0) | 0.001(0)    | 0.44(0.58)  | (0.17)   |
| 33               | 3878                 | Arizona 861 S-1*          | 2               | 0.079(0)    | 0.042(0)    | 0.333(0)    | 0.006(0) | 0.003(0)    | 0.537(0.83) | (0.17)   |
| 36               | 661                  | Indian*                   | 2               | 0.002(0)    | 0.014(0.17) | 0.52(0.17)  | 0.003(0) | 0.002(0)    | 0.458(0.25) | (0.5)    |
| 40               | 2590                 | Tien Chieh*               | 3               | 0.002(0)    | 0.002(0)    | 0.487(0)    | 0.002(0) | 0.506(0.75) | 0.001(0)    | (0.25)   |
| 60               | 3326                 | Scarlett Emperor          | 3               | 0.001(0)    | 0.006(0)    | 0.008(0)    | 0.001(0) | 0.982(0.83) | 0.001(0)    | (0.17)   |
| 73               | 3569                 | Encore                    | 3               | 0.003(0)    | 0.001(0)    | 0.003(0)    | 0.001(0) | 0.991(0.83) | 0.002(0)    | (0.17)   |
| 89               | 3844                 | Cleopatra*                | 3               | 0.001(0)    | 0.007(0)    | 0.29(0)     | 0.001(0) | 0.69(0.8)   | 0.011(0)    | (0.2)    |
| 90               | 3845                 | King*                     | 3               | 0.003(0)    | 0.002(0)    | 0.711(0)    | 0.001(0) | 0.275(0.75) | 0.008(0)    | (0.25)   |
| 117              | 2327                 | Ichang#                   | 4               | 0.002(0)    | 0.005(0)    | 0.989(50)   | 0.001(0) | 0.002(0.17) | 0.001(0)    | (0.33)   |
| 120              | 2485                 | Nasnanan*                 | 4               | 0.001(0)    | 0.003(0.08) | 0.871(0.08) | 0.001(0) | 0.122(0.5)  | 0.002(0)    | (0.33)   |
| 129              | 3228                 | Korai                     | 4               | 0.004(0)    | 0.002(0)    | 0.935(0.17) | 0.003(0) | 0.055(0.58) | 0.002(0)    | (0.25)   |
| 131              | 3469                 | Hanayu                    | 4               | 0.001(0)    | 0.002(0)    | 0.985(0.2)  | 0.005(0) | 0.003(0.5)  | 0.003(0)    | (0.3)    |
| 148              | 2242                 | Kao Pan                   | 5               | 0.985(0.75) | 0.002(0)    | 0.002(0)    | 0.001(0) | 0.003(0)    | 0.006(0)    | (0.25)   |
| 153              | 2248                 | Kao Panne                 | 5               | 0.993(0.75) | 0.001(0)    | 0.002(0)    | 0.001(0) | 0.003(0)    | 0.001(0)    | (0.25)   |
| 183              | 3855                 | Rubidoux*                 | 5               | 0.028(0.33) | 0.001(0)    | 0.354(0)    | 0.064(0) | 0.547(0.33) | 0.006(0)    | (0.33)   |
| 189              | 3945                 | Mato Buntan               | 5               | 0.99(0.67)  | 0.002(0)    | 0.002(0)    | 0.001(0) | 0.003(0)    | 0.001(0)    | (0.33)   |
| 200              | 571                  | Bouquet des Fleurs*       | 5               | 0.452(0.42) | 0.002(0)    | 0.525(0)    | 0.014(0) | 0.003(0.33) | 0.002(0)    | (0.25)   |
